# Supplementary material
Source: PubMed Central journal article supplement (PMC2255074)
Supplement: 97320630002157S1.pdf [file 97320630002157S1.pdf]

### Supplementary material

| Acc no       | Description                                                                     | Position<br>49 | Position<br>104 | Position<br>166 |
|--------------|---------------------------------------------------------------------------------|----------------|-----------------|-----------------|
| gi 18380986  | Folr2 protein [Mus musculus]                                                    | L              | F               | G               |
| gi 148684580 | Folate receptor 2 (fetal), isoform CRA_b [Mus musculus]                         | L              | F               | G               |
| gi 109462538 | PREDICTED: similar to Folate receptor beta precursor [Rattus norvegicus]        | L              | F               | G               |
| gi 149719667 | PREDICTED: similar to folate receptor 2 (fetal) [Equus caballus]                | L              | F               | E               |
| gi 62896637  | Folate receptor 2 precursor variant [Homo sapiens]                              | L              | F               | G               |
| gi 148277007 | Folate receptor 2 precursor [Homo sapiens]                                      | L              | F               | G               |
| gi 114639250 | PREDICTED: folate receptor 2 isoform 6 [Pan troglodytes]                        | L              | F               | G               |
| gi 114639248 | PREDICTED: similar to Folate receptor 2 isoform 7 [Pan troglodytes]             | L              | F               | G               |
| gi 109107807 | PREDICTED: folate receptor 2 [Macaca mulatta]                                   | L              | F               | G               |
| gi 114639236 | PREDICTED: similar to Folate receptor 2 isoform 3 [Pan troglodytes]             | L              | F               | G               |
| gi 73988197  | PREDICTED: similar to Folate receptor beta precursor [Canis familiaris]         | L              | I               | G               |
| gi 115496686 | Folate receptor 2 [Bos taurus]                                                  | L              | F               | G               |
| gi 55742703  | Folate binding protein [Sus scrofa]                                             | L              | I               | G               |
| gi 1169723   | Folate receptor gamma precursor (FR-gamma) Homo sapiens                         | L              | I               | G               |
| gi 114639226 | PREDICTED: similar to folate receptor FRGAMMA 3 [Pan troglodytes]               | L              | I               | G               |
| gi 62898786  | Folate receptor 1 precursor variant [Homo sapiens]                              | A              | V               | E               |
| gi 49456991  | FOLR1 [Homo sapiens]                                                            | A              | V               | E               |
| gi 114639246 | PREDICTED: folate receptor 1 isoform 1 [Pan troglodytes]                        | A              | V               | E               |
| gi 114639240 | PREDICTED: folate receptor 1 isoform 8 [Pan troglodytes]                        | A              | V               | E               |
| gi 109107805 | PREDICTED: similar to folate receptor 1 precursor isoform 2 [Macaca mulatta]    | A              | V               | E               |
| gi 114639238 | PREDICTED: folate receptor 1 isoform 2 [Pan troglodytes]                        | A              | V               | G               |
| gi 119907523 | PREDICTED: similar to folate receptor alpha [Bos taurus]                        | A              | I               | E               |
| gi 4928859   | Membrane-bound folate binding protein [Sus scrofa]                              | A              | I               | Q               |
| gi 73988199  | PREDICTED: similar to folate receptor 1 (adult) [Canis familiaris]              | A              | I               | E               |
| gi 544338    | Folate receptor alpha precursor [Mus musculus]                                  | A              | I               | E               |
| gi 19424178  | Folate receptor 1 (adult) [Rattus norvegicus]                                   | D              | I               | K               |
| gi 149068707 | Folate receptor 1 (adult), isoform CRA_b [Rattus norvegicus]                    | A              | I               | K               |
| gi 5823002   | Folate receptor alpha [Cricetulus griseus]                                      | A              | I               | K               |
| gi 149719669 | PREDICTED: similar to folate receptor alpha [Equus caballus]                    | A              | I               | K               |
| gi 149702958 | PREDICTED: similar to folate receptor alpha [Equus caballus]                    | A              | I               | K               |
| gi 110282963 | Folate receptor alpha precursor (FR-alpha) (Milk folate-binding protein) Bovine | A              | V               | K               |
| gi 47523188  | Secreted folate binding protein [Sus scrofa]                                    | A              | I               | K               |
| gi 126327964 | PREDICTED: similar to secreted folate binding protein [Monodelphis domestica]   | A              | V               | N               |
| gi 126327958 | PREDICTED: similar to secreted folate binding protein [Monodelphis domestica]   | A              | V               | N               |
| gi 126327962 | PREDICTED: similar to secreted folate binding protein [Monodelphis domestica]   | A              | V               | N               |
| gi 45382285  | Folate receptor 1 (adult) [Gallus gallus]                                       | A              | I               | K               |
| gi 122937406 | Similar to folate receptor 4 (delta) isoform 1 [Homo sapiens]                   | A              | V               | K               |
| gi 114639852 | PREDICTED: similar to Folate receptor 4 (delta) [Pan troglodytes]               | A              | V               | K               |
| gi 109108355 | PREDICTED: similar to folate receptor 4 (delta) isoform 1 [Macaca mulatta]      | A              | V               | K               |
| gi 11527086  | Folate receptor 3 [Mus musculus]                                                | A              | V               | K               |
| gi 20306583  | Folate receptor 4 (delta) [Mus musculus]                                        | A              | V               | K               |
| gi 28827784  | Folate receptor 4 (delta) isoform 2 [Mus musculus]                              | A              | V               | -               |
| gi 148693064 | Folate receptor 4 (delta), isoform CRA_a [Mus musculus]                         | A              | V               | -               |
| gi 109484247 | PREDICTED: similar to folate receptor 4 (delta) [Rattus orvegicus]              | A              | L               | K               |
| gi 109483088 | PREDICTED: similar to folate receptor 4 (delta) isoform 1 [Rattus norvegicus]   | A              | L               | K               |
| gi 73987778  | PREDICTED: similar to folate receptor 4 (delta) isoform 1 [Canis familiaris]    | A              | I               | S               |

List of sequences used for multiple sequence alignment and three binding site residue and their convergence among all the folate receptor sequences
